# Supplementary material
Source: PubMed Central journal article supplement (PMC3911041)
Supplement: AEM.02967-13_zam999105120so1.pdf [file AEM.02967-13_zam999105120so1.pdf]

1  
2 **Ice nucleation active bacteria on plants and in precipitation measured using quantitative PCR**

3 T. C. J. Hill, B. F. Moffett, P. J. DeMott, D. G. Georgakopoulos, W. L. Stump and G. D. Franc

4  
5 GenBank accession numbers for reference sequences given in Fig. 2 are: *inaZ* (X03035), *inaK* (AF013159),  
6 *inaQ* (EU360731), *Ice4* (FN650702), locus tag Psyr1608 (CP000075), *inaV* (AJ001086), *inaZ* interrupted by  
7 insert (CP000058), *IceA* (AF387802), locus tag PAJ 3728 (AP012032), *inaA* (X17316), locus tag PANA 0591  
8 (CP001875), locus tag PANA5342\_3725 (HE617160), *inaU* (D14992), locus tag PAGR g3607 (CP003085),  
9 *iceE* (M26382), locus tag XC 0519 (CP000050), locus tag XCR 4000 (CP002789), *inaX* (X52970), *inaPb*  
10 (EU73998) and *inaW* (X04501).  
11

12 Table S1. Details of sites and samples.

| Site               | Latitude  | Longitude  | Alt. (m) | Date sampled | Date snowfall | Sample <sup>1</sup>      | Sample wt. (g) | Color of filter                | pH  | Cond. (µS) |
|--------------------|-----------|------------|----------|--------------|---------------|--------------------------|----------------|--------------------------------|-----|------------|
| SAREC (Lingle, WY) | 42.1290 N | 104.394 W  | 1270     | 7/15/2010    |               | Alfalfa (Garts 631)      | 43.0           |                                |     |            |
| "                  | 42.1315 N | 104.3965 W | "        | "            |               | Corn (Pioneer38&88, RR)  | 31.5           |                                |     |            |
| "                  | 42.1315 N | 104.392 W  | "        | "            |               | Pinto and Navy beans     | 38.2           |                                |     |            |
| "                  | 42.1315 N | 104.393 W  | "        | "            |               | Potato (F11867)          | 21.7           |                                |     |            |
| "                  | 42.1290 N | 104.393 W  | "        | "            |               | Sugar beet (Beta 66RR70) | 36.4           |                                |     |            |
| "                  | 42.1315 N | 104.395 W  | "        | "            |               | Barley (Burton)          | 27.4           |                                |     |            |
| "                  | 42.1320 N | 104.395 W  | "        | "            |               | Smooth brome grass       | 23.4           |                                |     |            |
| "                  | 42.1315 N | 104.394 W  | "        | "            |               | Winter wheat (Jagalene)  | 45.0           |                                |     |            |
| Laramie Mountains  | 41.1917 N | 105.3204 W | 2400     | 8/5/2010     |               | Crested wheat grass      | 22.3           |                                |     |            |
| "                  | "         | "          | "        | "            |               | Smooth brome grass       | 23.4           |                                |     |            |
| "                  | "         | "          | "        | "            |               | Western wheatgrass       | 27.4           |                                |     |            |
| "                  | 41.2385 N | 105.3451 W | 2434     | "            |               | Common timothy           | 30.5           |                                |     |            |
| "                  | "         | "          | "        | "            |               | Redtop bentgrass         | 28.0           |                                |     |            |
| "                  | 41.3864 N | 105.4797 W | 2370     | 8/29/2010    |               | Aspen                    | 42.6           |                                |     |            |
| "                  | 41.3880 N | 105.4783 W | 2398     | "            |               | Mountain mahogany        | 24.9           |                                |     |            |
| "                  | 41.3864 N | 105.4797 W | 2370     | "            |               | Lodgepole pine           | 42.7           |                                |     |            |
| "                  | "         | "          | "        | "            |               | Sagebrush                | 29.3           |                                |     |            |
| Laramie            | 41.3002 N | 105.5770 W | 2205     | 6/10/2010    | 6/10/2010     | Hail (~285 pieces)       | 122            | Very light, hint of color      | 5.8 | -          |
| Laramie Mountains  | 41.2402 N | 105.4407 W | 2646     | 1/26/2011    | 1/25/2011     | Snow (-4 to -6)          | 1808           | Tan                            | 5.7 | 9.8        |
| Laramie            | 41.3002 N | 105.5770 W | 2205     | "            | "             | "                        | 1917           | Light tan                      | 6.1 | 4.6        |
| Laramie Mountains  | 41.2402 N | 105.4407 W | 2646     | 2/1/2011     | 1/31/2011     | Snow (-11 to -24)        | 1922           | Tan                            | 5.6 | 7.1        |
| Laramie            | 41.3002 N | 105.5770 W | 2205     | "            | "             | "                        | 1486           | Light tan                      | 5.6 | 6.0        |
| "                  | "         | "          | "        | 2/6/2011     | 2/5&6/2011    | Snow (-2 to -11)         | 1832           | Light tan                      | 6.0 | 5.3        |
| "                  | "         | "          | "        | 2/25/2011    | 2/24&25/2011  | Snow (-6 to -9)          | 1912           | Very light                     | 5.6 | 3.6        |
| Laramie Mountains  | 41.2402 N | 105.4407 W | 2646     | 3/8/2011     | 3/8/2011      | Snow (-3 to -9)          | 1554           | Brown                          | 6.2 | 8.7        |
| Laramie            | 41.3002 N | 105.5770 W | 2205     | 3/13/2011    | 3/12&13/2011  | Snow (0 to -1)           | 1208           | Very light                     | 5.9 | 5.2        |
| "                  | "         | "          | "        | 3/29/2011    | 3/28&29/2011  | Snow (-2 to -6)          | 1189           | Very light                     | 5.1 | 6.4        |
| Laramie            | 41.3132 N | 105.5823 W | 2193     | 1/22/2012    | 1/22/2012     | Snow (-1 to -5)          | 1401           | Brown with black flecks        | 6.6 | 4.5        |
| Laramie Mountains  | 41.2402 N | 105.4407 W | 2646     | 2/3/2012     | 2/2&3/2012    | Snow (-4 to -7)          | 1190           | Light brown                    | 7.0 | 6.9        |
| Laramie            | 41.3002 N | 105.5770 W | 2205     | "            | "             | "                        | 1368           | Chocolate brown, fine organics | 6.1 | 19.4       |
| Laramie Mountains  | 41.2258 N | 105.4447 W | 2676     | 2/13/2012    | 2/12&13/2012  | Snow (-2 to -6)          | 1661           | Light tan                      | 5.3 | 3.9        |
| Laramie site 1     | 41.3002 N | 105.5770 W | 2205     | 2/28/2012    | 2/28/2012     | Snow (-3 to -6)          | 1164           | Very light                     | 6.6 | 2.4        |
| Laramie site 2     | 41.3064 N | 105.5732 W | 2193     | "            | "             | "                        | 1066           | Light brown                    | 6.3 | 5.4        |
| Laramie Mountains  | 41.2258 N | 105.4447 W | 2676     | 4/16/2012    | 4/15&16/2012  | Snow (+3 to -4)          | 1699           | Fine grey brown                | 6.3 | 6.0        |

13

14 <sup>1</sup> For snow samples, the ground air temperature range in Laramie (°C) during the snowfall is given in parentheses.

15 Table S2. Relative efficiencies of qPCR amplification of isolates compared to reference strain *Ps. syringae* Cit7.  
 16 Threshold signal levels used to derive the comparisons are shown in Fig. S1. All reactions were initiated with  
 17 10 ng of genomic DNA. FP, false positive; No A, no amplification; MP, mis-prime.

| Amplification efficiency of isolates, relative to <i>Ps. syringae</i> Cit7,<br>using primer pairs 3308f/3463r and 3341fb/3462r1 (×) |                                                |                 |                                                                                                                                           |                   |
|-------------------------------------------------------------------------------------------------------------------------------------|------------------------------------------------|-----------------|-------------------------------------------------------------------------------------------------------------------------------------------|-------------------|
| Isolate                                                                                                                             | Species                                        | 3308f/<br>3463r | Notes                                                                                                                                     | 3341fb/<br>3462r1 |
| Cit7                                                                                                                                | <i>Ps. syringae</i>                            | 1               |                                                                                                                                           | 1                 |
| BXIN4                                                                                                                               | <i>Ps. syringae/congelans</i>                  | 2.4             |                                                                                                                                           | 1.2               |
| GCh5Fc                                                                                                                              | <i>Ps. syringae/congelans</i>                  | 6.4             |                                                                                                                                           | 2.0               |
| BXIN3                                                                                                                               | <i>Ps. syringae/congelans</i>                  | 0.6             |                                                                                                                                           | 6.6               |
| PCa2bi                                                                                                                              | <i>Ps. viridiflava</i>                         | 2.0             | MP off non- <i>ina</i> gene by both primers<br>(292 bp, 86% similarity to a potassium<br>channel protein in <i>Ps. syringae</i> )         | ▶ FP              |
| Sco1009b                                                                                                                            | <i>Ps. syringae</i> pv.<br><i>atropurpurea</i> | No A            |                                                                                                                                           | 0.3               |
| GrF                                                                                                                                 | <i>Pa. ananatis</i>                            | 2.1             | Minor MP off non- <i>ina</i> gene (373 bp, 99%<br>sequence similarity to a maltose import<br>ATP-binding protein in <i>Pa. ananatis</i> ) | ▶ 0.9             |
| SBPci                                                                                                                               | <i>Pa. agglomerans</i>                         | 0.05            | ◀ Underestimation mainly by MP off base<br>3356 <sup>1</sup> , generating a 146 bp amplicon                                               | 0.7               |
| Sba1007a                                                                                                                            | <i>X. campestris</i> pv.<br><i>campestris</i>  | No A            |                                                                                                                                           | 0.5               |
| Sba1007bi                                                                                                                           | <i>X. campestris</i> pv.<br><i>campestris</i>  | No A            |                                                                                                                                           | 0.4               |
| Sbr1009a                                                                                                                            | <i>X. translucens</i>                          | 0.005           | ◀ Underestimation by MP off base 3356 <sup>1</sup> ,<br>generating a 146 bp amplicon                                                      | 0.13              |
| MU26                                                                                                                                | <i>Ps. fluorescens</i>                         | 0.3             |                                                                                                                                           | 5.5               |
| LSb                                                                                                                                 | <i>Ps. sp. (putida?)</i>                       | 1.5             | Multiple MPs and cause not clear, but not<br>mis-match to forward primer                                                                  | ▶ FP              |
| MM3b                                                                                                                                | <i>Ps. sp. (putida?)</i>                       | 0.6             | Overestimation by efficient MP off base<br>3317 <sup>1</sup> , generating a 186 bp amplicon                                               | ▶ 4.2             |
| BF81Fb                                                                                                                              | <i>Ps. koreensis/fluorescens/<br/>putida</i>   | 0.2             | ◀ Underestimation by MP off base 3356 <sup>1</sup> ,<br>generating an additional 146 bp amplicon                                          | 3.8               |
| χ16                                                                                                                                 | <i>Ps. auricularis</i>                         | 0.5             |                                                                                                                                           | 1.4               |
| χ17                                                                                                                                 | <i>Ps. poae</i>                                | 0.03            | ◀ Underestimation possibly by exclusion of<br>primer by secondary fold. No mis-<br>matches with either primer                             | 1.2               |
| GraPa8                                                                                                                              | <i>Ps. sp./auricularis</i>                     | 0.5             |                                                                                                                                           | 1.9               |

18

19 <sup>1</sup> Using the base numbering according to that of *inaZ*

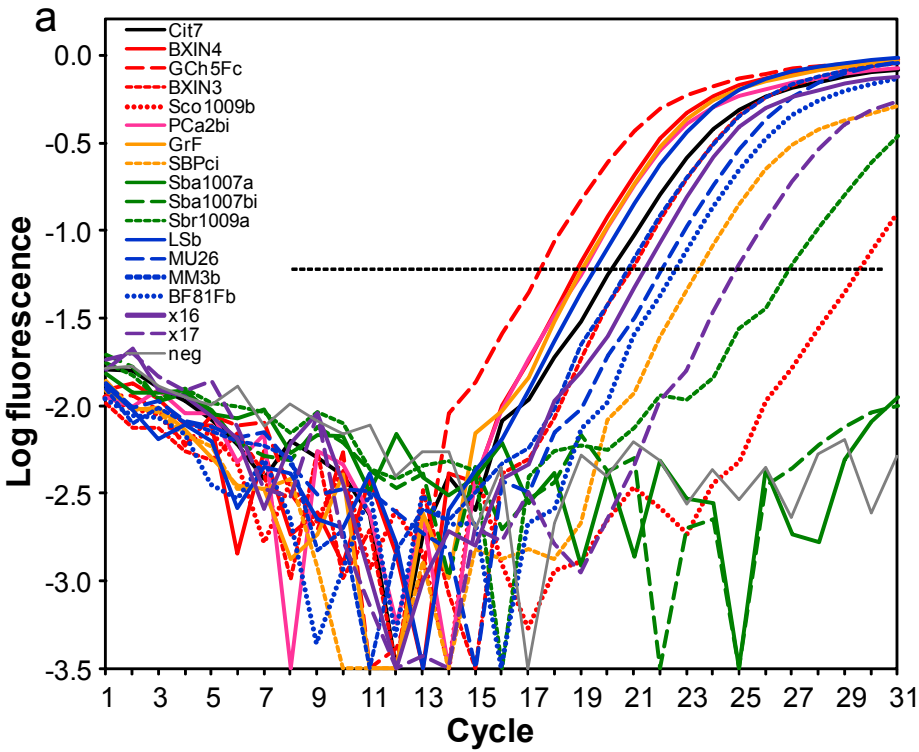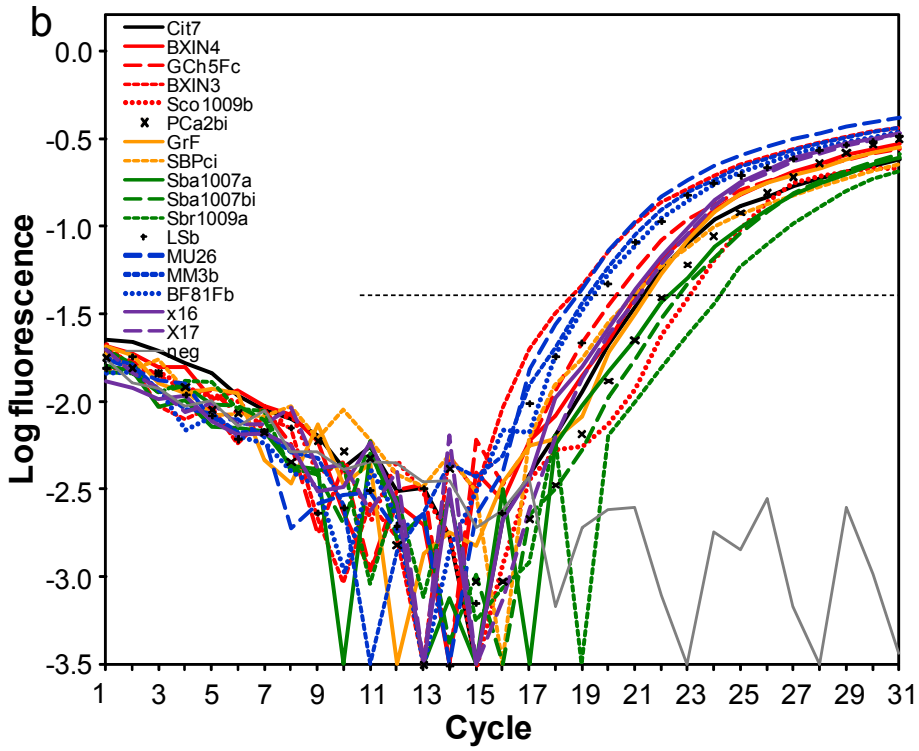

22 Figure S1. Comparison of qPCR performance for primer pairs 3308f/3463r (a) and 3341fb/3462r1 (b) designed  
23 to amplify a broad range of *ina* gene alleles. Horizontal dashed lines are the threshold signal values used to  
24 compare amplification efficiencies in Table S2.

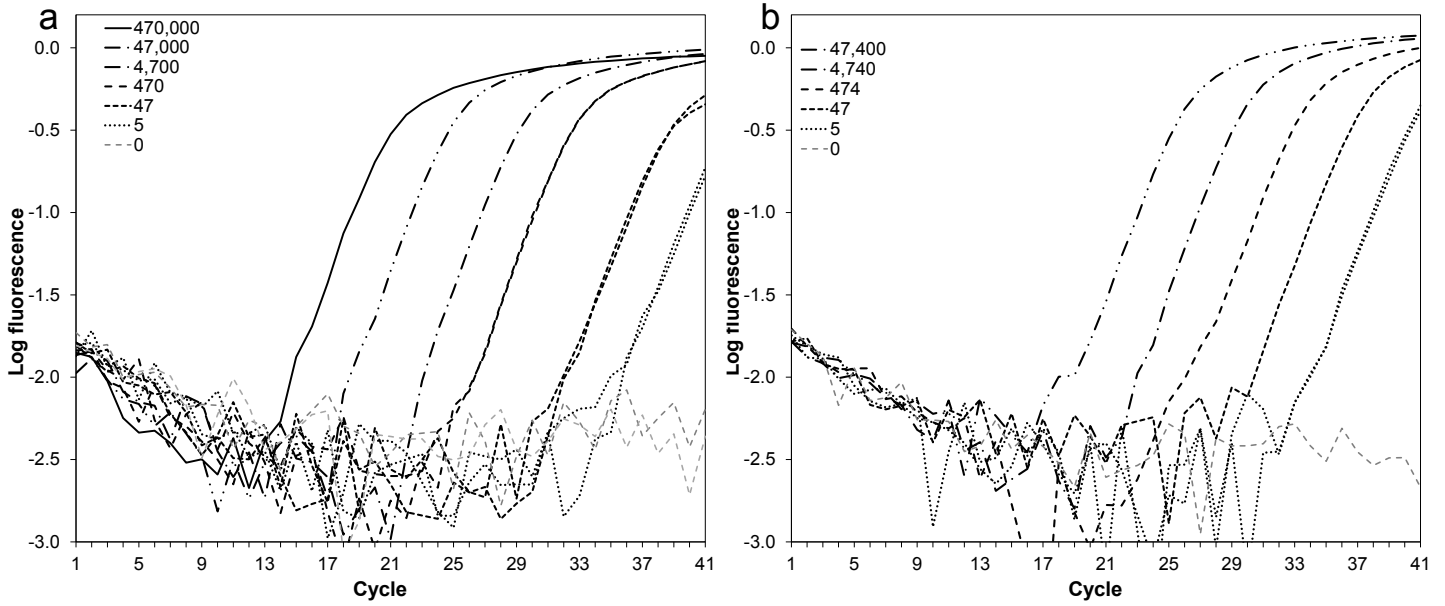

25  
26

27 Figure S2. (a) Quantitative PCR standard series using primers 3308f/3462r1 with *Ps. syringae* Cit7 DNA  
 28 (annealing and extension at 53°C, 1% DMSO). The legend values are the number of *ina* gene copies per  
 29 reaction. Standards were made by extraction of DNA from 50 µl aliquots of cells taken from a dilution series of  
 30 the isolate. When reverse primer 3463r was used the result was identical except for a lack of amplification of  
 31 the lowest 5 gene copy standard. (b) qPCR using 3380f with 3463r but under more stringent PCR conditions  
 32 (annealing and extension at 54°C, 4% DMSO), enabling 5 gene copies to be amplified.

33

34

Figure S3 displays eight scatter plots showing the relationship between ice nucleating particle concentration (Ice nuclei or *ina* genes  $g^{-1}$ ) and temperature ( $^{\circ}C$ ) for various irrigated crops at SAREC. The y-axis is logarithmic, ranging from  $1E+0$  to  $1E+8$ . The x-axis ranges from  $-20^{\circ}C$  to  $0^{\circ}C$ . The crops shown are Alfalfa, Corn, Beans, Potato (top row) and Sugar beet, Barley, Bromus, Wheat (bottom row). Each plot includes data points for unamended samples (solid green circles), samples heated to  $60^{\circ}C$  (shaded green circles), and samples heated to  $105^{\circ}C$  (open green circles). A horizontal bar at  $-12^{\circ}C$  indicates the *ina* gene copy concentrations.

35

36 Figure S3. Ice nucleating particle temperature spectra in leaf washings from irrigated crops at SAREC. Solid  
 37 circles are unamended samples, shaded circles are samples heated to  $60^{\circ}C$  and open circles are samples heated  
 38 to  $105^{\circ}C$ . *ina* gene copy concentrations are shown as a bar at  $-12^{\circ}C$ .

39

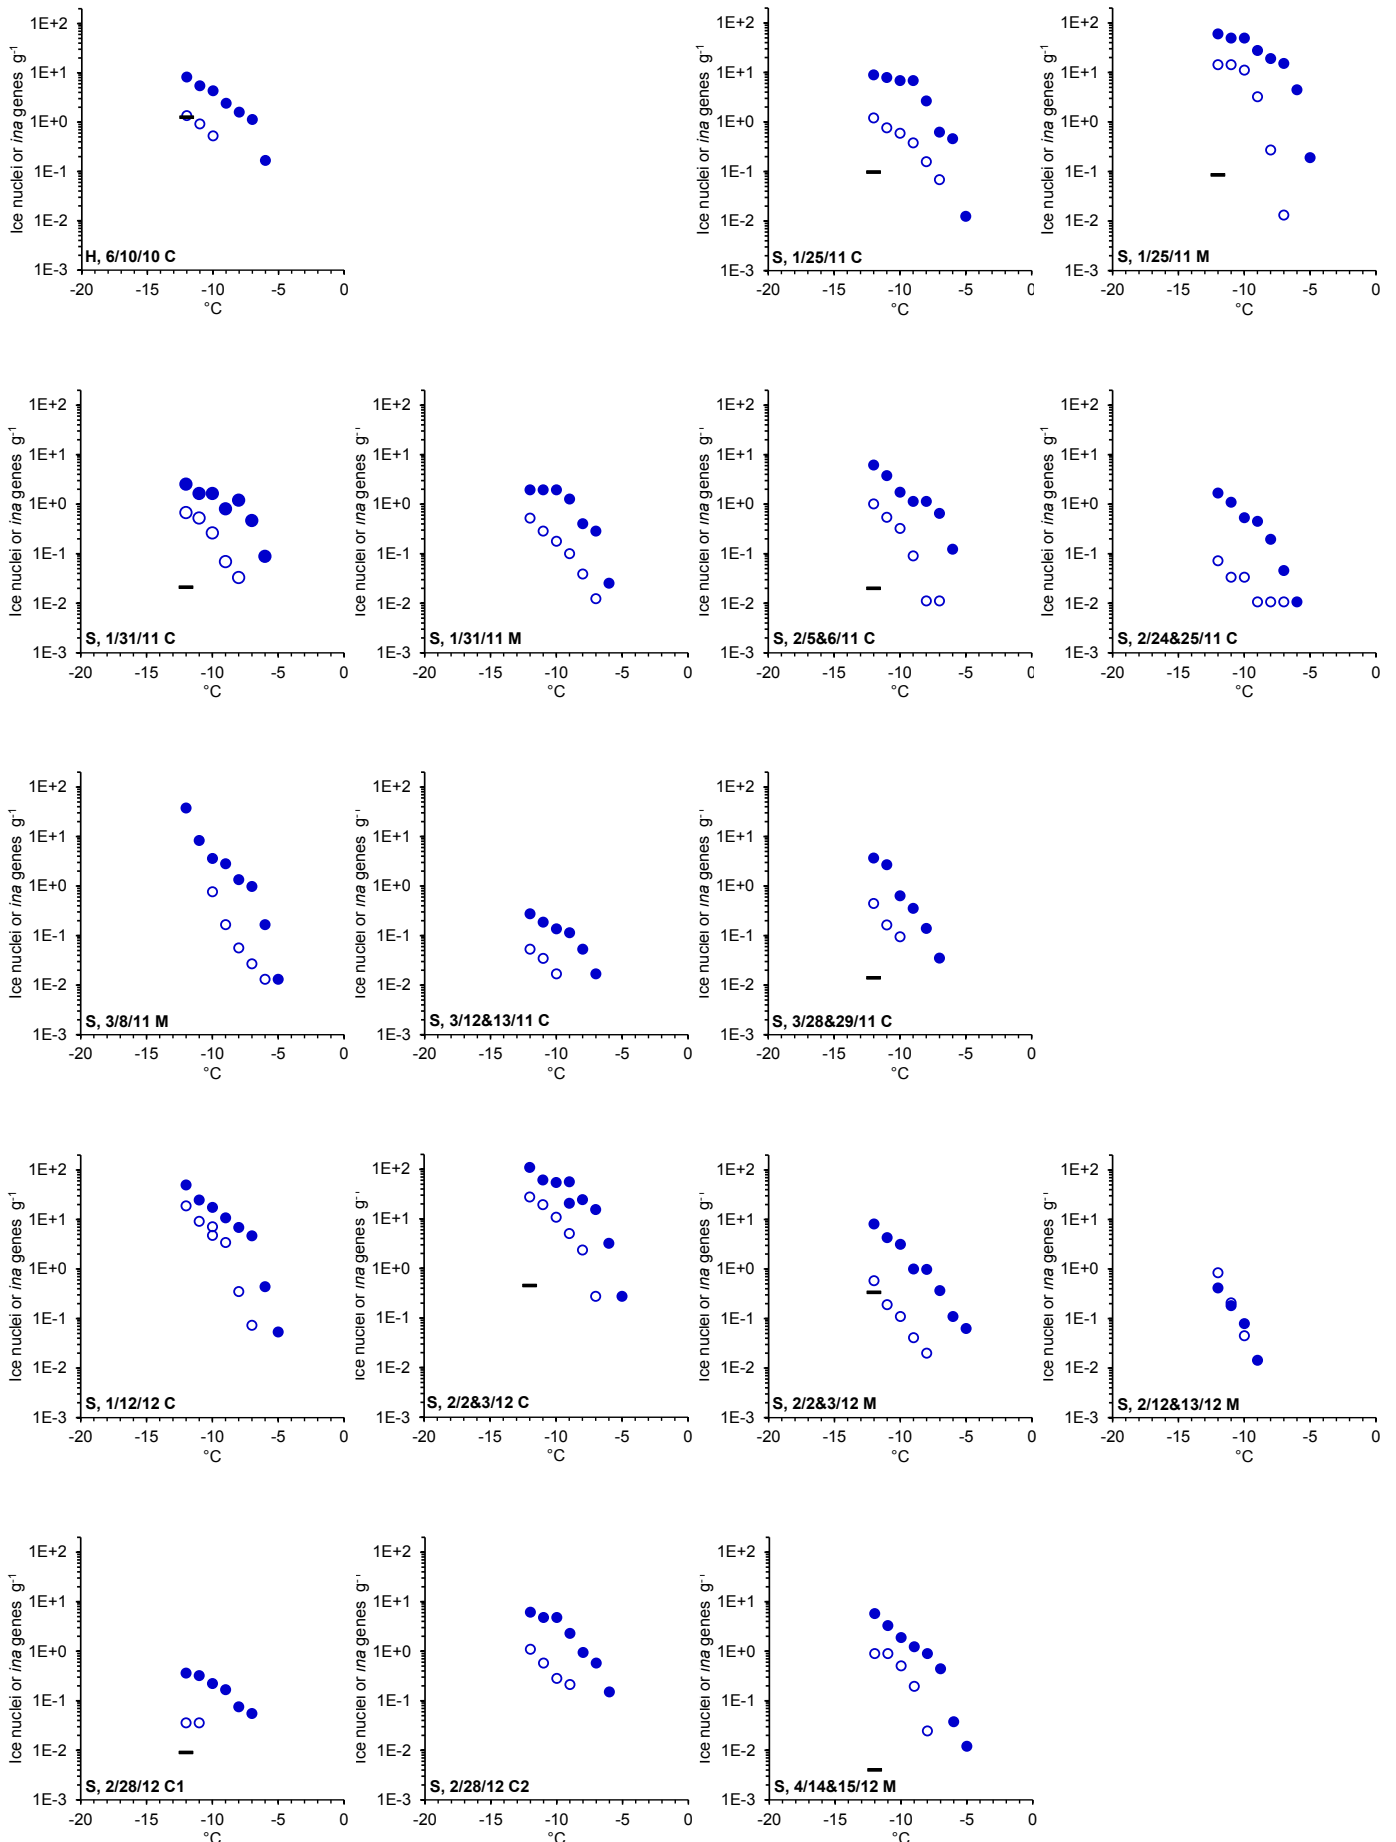

41 Figure S4. Ice nucleating particle temperature spectra in precipitation samples. Solid circles are unamended  
42 samples and open circles are samples heated to 105°C. *ina* gene copy concentrations, when detected, are shown  
43 as a bar at -12°C. H and S indicate hail and snow samples, and C and M indicate samples collected in Laramie  
44 city and in the Laramie Mountains, respectively.
